# 1 Parenting Self-Efficacy within the First Year Postpartum in Non- 2 Birthing Parents: A Scoping Review Protocol

## 3 Authors

4 Justine Dol<sup>1,2</sup> Jennifer A. Parker<sup>1</sup> Christine T Chambers<sup>1,3,4</sup> Phillip Joy<sup>5</sup> Patricia Leahy-  
5 Warren<sup>6</sup> Cindy-Lee Dennis<sup>7,8</sup> Marilyn Macdonald<sup>9,2</sup>, Kristy Hancock<sup>10</sup>

- 6  
7 1. Centre for Pediatric Pain Research, IWK Health, Halifax, NS, Canada  
8 2. Aligning Health Needs and Evidence for Transformative Change: A JBI Centre of  
9 Excellence, Dalhousie University, Halifax, NS, Canada  
10 3. Department of Psychology and Neuroscience, Dalhousie University, Halifax, NS, Canada  
11 4. Department of Pediatrics, Dalhousie University, Halifax, NS, Canada  
12 5. Applied Human Nutrition, Mount Saint Vincent University, Halifax, NS, Canada  
13 6. School of Nursing & Midwifery, University College Cork, Cork, Ireland  
14 7. Lawrence S. Bloomberg Faculty of Nursing, University of Toronto, Toronto, ON, Canada  
15 8. Lunenfeld-Tannenbaum Research Institute, Sinai Health, Toronto, ON, Canada  
16 9. School of Nursing, Dalhousie University, Halifax, NS, Canada  
17 10. Maritime SPOR Support Unit, Halifax, NS, Canada

### 18 Corresponding Author:

19 Dr. Justine Dol,  
20 Centre for Pediatric Pain Research  
21 IWK Health,  
22 Halifax, Nova Scotia, Canada,  
23 justine.dol@dal.ca

## 24 Abstract

25 **Objective:** The objective of this scoping review is to identify and analyze the literature on  
26 parenting self-efficacy in the non-birthing parent within the first year postpartum.

27 **Introduction:** Parenting self-efficacy is a parent's confidence in their ability to organize and  
28 execute a set of tasks related raising children and providing them with protection and care in  
29 order to ensure their healthy development. To date, much of the work on parenting self-  
30 efficacy has focused on the birthing parent (e.g., mothers) excluding the non-birthing parent  
31 (e.g., fathers and LGBTQ+ parents).

32 **Inclusion criteria:** Studies that include participants that identify as the non-birthing parent  
33 (regardless of sex or gender) who have had an infant less than 12 months of age. Various  
34 self-efficacy outcomes related to parenting will be included, as well as sub-types of self-  
35 efficacy (e.g., chest/breastfeeding). No limitations based on context, geography, or parity will  
36 be applied. All qualitative and quantitative study designs will be included.

37 **Methods:** Databases to be searched will include MEDLINE, Embase, Web of Science,  
38 CINAHL, and PsycINFO with no time limitations applied. Title and abstracts and full text  
39 will be screened by two reviewers with disagreements solved with a third reviewer. The data  
40 extracted will include specific details about the population, study, methods, and outcomes.

41 Data will be reported narratively and in tables, as appropriate.

**NOTE:** This preprint reports new research that has not been certified by peer review and should not be used to guide clinical practice.

## 42 Introduction

43 Parenting self-efficacy has been defined as “beliefs or judgments a parent holds of  
44 their capabilities to organize and execute a set of tasks related to parenting a child” (p.390).<sup>1</sup>  
45 Bandura, the pioneer of self-efficacy theory, suggested that the greater a person’s confidence  
46 related to a specific behaviour (i.e., parenting), the more likely they are to engage in that  
47 behaviour.<sup>2</sup> Thus, the development of parenting self-efficacy is an essential component in the  
48 establishment of high-quality parenting habits that promote optimal child development.

49 Parenting self-efficacy can be examined targeting either general self-efficacy across  
50 the parenting role or task specific self-efficacy (e.g., breastfeeding).<sup>3</sup> In a systematic review  
51 on self-report measures of parenting self-efficacy, Wittkowski et al.<sup>3</sup> identified 34 different  
52 measures, none of which have been consistently used in the literature. Furthermore, none  
53 have been specifically developed for the non-birthing parent.<sup>4</sup> There is also variation in the  
54 level of self-efficacy measurement, which can include global (beliefs about an ability to  
55 complete any task), domain-general (beliefs about being able to complete a specific task –  
56 i.e., parenting), and domain-specific (beliefs about being able to complete a specific task in  
57 certain area or conditions – i.e., breastfeeding, newborn stage).<sup>2,4</sup> While global self-efficacy is  
58 not applicable in the current review, both domain-general and domain-specific can be related  
59 to parenting and parenting behaviours.

60 To date, much of the parenting self-efficacy work has focused on the birthing person  
61 or mother. Maternal self-efficacy has been found to positively influence parenting behaviour,  
62 which is associated with positive newborn and child outcomes.<sup>5,6</sup> Various factors have been  
63 found to influence feelings of maternal self-efficacy, including parity,<sup>7,8</sup> levels of social  
64 support,<sup>9,10</sup> and postpartum anxiety and depression.<sup>11,12</sup>

65 Overall, there has been a general lack of parenting self-efficacy research on the non-  
66 birthing parent and the work completed thus far is disjointed. Previous work comparing  
67 mothers and fathers’ found that mothers had greater parenting self-efficacy than fathers<sup>13</sup>  
68 while others have found no difference.<sup>14</sup> Importantly, paternal self-efficacy has been found to  
69 be positively associated with supportive, early, and engaged parenting,<sup>15,16</sup> suggesting that  
70 fathers’ level of self-efficacy is important for child and family outcomes. Correlates of  
71 greater paternal parenting self-efficacy have been found to contribute to a positive co-  
72 parenting relationship,<sup>17</sup> increased social support,<sup>14</sup> enhanced parenting satisfaction,<sup>14</sup> and

73 lower parenting stress.<sup>18,19</sup> What is currently lacking is a collation and summarization of all  
74 literature to date to guide future work.

75         There is even less research on parenting self-efficacy in non-heterosexual parenting  
76 relationships, including various configurations of LGBTQ+ partners.<sup>20,21</sup> This is despite a  
77 growing number of non-heterosexual family structures, with the percentage of same-sex  
78 child-rearing couples in Canada growing from 8.6% in 2001 to 12.0% in 2016.<sup>22</sup> In Canada,  
79 23.6% of the heterosexual population were considered parents with a child under the age of  
80 18, compared to 13.4% of bisexual people and 6.2% of gay and lesbian individuals.<sup>23</sup> In the  
81 United States, approximately 19% of same-sex couple households had a child under the age  
82 of 18.<sup>24</sup> In one study that compared heterosexual-parents, gay-father families, and lesbian  
83 mother-families no differences between family type on perceptions of parental self-efficacy.<sup>25</sup>  
84 Conversely, another study found that lesbian mothers, heterosexual mothers, and gay fathers  
85 all reported higher parenting self-efficacy than heterosexual fathers. As the number of non-  
86 heterosexual parents continue to grow, it is important to synthesize the current evidence  
87 related to parenting self-efficacy in the non-birthing parent and to compare differences  
88 among various populations (e.g., gay fathers, lesbian mothers, transgendered parents,  
89 heterosexual fathers)

90         A preliminary search of MEDLINE, the Cochrane Database of Systematic Reviews  
91 and JBI Evidence Synthesis was conducted and no current or underway systematic reviews or  
92 scoping reviews on the topic were identified. The objective of this scoping review is to  
93 identify and analyze the literature on parenting self-efficacy in the non-birthing parents  
94 within the first year postpartum.

## 95 **Keywords**

96 Self-efficacy; paternal; LGBTQ+; scoping review

## 97 Eligibility Criteria

### 98 **Participants**

99 The review will consider studies that include participants that identify as the non-  
100 birthing parent (regardless of sex or gender). Parenting self-efficacy will span the whole  
101 postpartum period – from birth to 12 months post-birth. Both biological and adoptative  
102 parents will be included, regardless of conception method (e.g., natural, surrogacy, in vitro  
103 fertilization). No geographical or parity limitations will be applied. Parents of both full-term  
104 and preterm infants will be included as well as singletons and multiples. Studies that solely  
105 reported on maternal outcomes or did not separate out paternal outcomes (e.g., reports on  
106 parents broadly) will be excluded. Studies that report across the perinatal period, including  
107 the antenatal period, will be included.

### 108 **Concept**

109 This review will seek to map the data on parenting self-efficacy outcomes relevant to  
110 the non-birthing parent (regardless of sex or gender) in their role as a parent as reported in the  
111 literature. Studies reporting on domain-general (beliefs about being able to complete a  
112 specific task – i.e., parenting self-efficacy) or domain-specific (beliefs about being able to  
113 complete a specific task in certain area or conditions – i.e., breastfeeding self-efficacy) will  
114 be included.

115 It is important to note that there is significant variation in terminology used to discuss  
116 parenting self-efficacy. For instance, in the literature, parenting confidence, parenting self-  
117 efficacy, and perceived competence have been used interchangeably with inconsistent  
118 conceptual definitions.<sup>4</sup> Given that parenting self-efficacy is the most consistently used term,<sup>4</sup>  
119 this will be used throughout the review, with the understanding that some studies may  
120 individually use the term competence and confidence. As such, these terms will be included  
121 in the search strategy for this review in order to capture all relevant studies.

### 122 **Context**

123 Existing scoping reviews have primarily focused on qualitative studies looking at first  
124 time fathers across the perinatal period<sup>26</sup> or included all first-time parents<sup>27</sup>. Thus, there is a  
125 gap in evidence synthesis on the experience of the non-birthing parent's parenting self-  
126 efficacy and those who are multiparous.

## 127 **Type of Sources**

128 This scoping review will consider both experimental and quasi-experimental study  
129 designs including randomized controlled trials, non-randomized controlled trials, before and  
130 after studies and interrupted time-series studies. In addition, analytical observational studies  
131 including prospective and retrospective cohort studies, case-control studies and analytical  
132 cross-sectional studies will be considered for inclusion. This review will also consider  
133 descriptive observational study designs including case series, individual case reports and  
134 descriptive cross-sectional studies for inclusion.

135 Further, qualitative studies will be considered that include, but are not limited to,  
136 designs such as phenomenology, grounded theory, ethnography, qualitative description,  
137 action research and feminist research.

138 Mixed method studies will also be included. Reviews (systematic, non-systematic,  
139 scoping, etc.) will be excluded but will be evaluated for original studies to be included, if  
140 applicable. Letters to the editor, editorials, commentaries, conference abstracts, dissertations,  
141 books, book chapters, and grey literature will not be included. If less than five peer reviewed  
142 studies are available for analysis, preprints will be searched for additional studies. Otherwise,  
143 preprints will not be included as they have not yet been peer-reviewed.

## 144 **Method**

145 This review will be reported following the PRISMA extension for Scoping Reviews<sup>28</sup>  
146 and will be conducted in accordance with the Joanna Briggs Institute (JBI) methodology for  
147 scoping review.<sup>29</sup>

## 148 **Search strategy**

149 The search strategy was developed in consultation with a health science librarian and  
150 will aim to locate published studies. An initial limited search of MEDLINE was undertaken  
151 to identify articles on the topic. The text words contained in the titles and abstracts of relevant  
152 articles, and the index terms used to describe the articles were used to develop a full search  
153 strategy for PSYCInfo (see Appendix 1). The search strategy was peer-reviewed by a second  
154 health sciences librarian using the Peer Review of Electronic Search Strategies (PRESS)  
155 Guideline<sup>30</sup> and refined according to the feedback received. The final search strategy,  
156 including all identified keywords and index terms, will be adapted for each included database  
157 and/or information source. Databases to be searched include MEDLINE All (Ovid), Embase  
158 (Elsevier), CINAHL Full Text (EBSCO), Scopus (Elsevier), and PsycINFO (EBSCO). The

159 reference list of all included sources of evidence will be screened for additional studies using  
160 Citation Chaser or Scopus. No time limitations will be applied.

### 161 **Study selection**

162 All identified citations through the search will be uploaded to Covidence<sup>31</sup> and  
163 duplicates will be removed through their automation process. After a pilot of  
164 inclusion/exclusion criteria, title and abstracts and full text will be screened by two reviewers  
165 with disagreements solved with a third reviewer or discussion. Reasons for exclusion at the  
166 full-text stage will be reported. Results of the search will be reported in full in the final  
167 scoping review and presented in a PRISMA flow diagram.<sup>28</sup>

### 168 **Data extraction & synthesis**

169 The data extracted will include specific details about the population, study, methods,  
170 and outcomes. Data extraction will be piloted before full data are extracted by one reviewer  
171 and verified by another. The findings will be presented in narrative form including tables and  
172 figures, where appropriate. For qualitative studies, data related to primary themes will be  
173 extracted. For quantitative studies, data related to rates of self-efficacy, relation to other  
174 populations (e.g., mothers), measurement tools, and correlated outcomes (e.g., stress, anxiety,  
175 depression) will be extracted as available and appropriate. Consideration for population  
176 characterises will be considered in the analysis (e.g., comparing parenting self-efficacy in  
177 parents of full-term and pre-term infants).

178 References

- 179 1. de Montigny F, Lacharite Carl. Perceived parental efficacy: Concept analysis. *J Adv*  
180 *Nurs*. 2005;49(4):387–96.
- 181 2. Bandura A. Self-efficacy: Toward a unifying theory of behavioral change. *Psychol Rev*.  
182 1977;84(2):191–215.
- 183 3. Wittkowski A, Garrett C, Calam R, Weisberg D. Self-Report Measures of Parental Self-  
184 Efficacy: A Systematic Review of the Current Literature. *J Child Fam Stud*.  
185 2017;26(11):2960–78.
- 186 4. Vance AJ, Brandon DH. Delineating among Parenting Confidence, Parenting Self-  
187 Efficacy and Competence. *ANS Adv Nurs Sci*. 2017;40(4):E18–37.
- 188 5. Jones TL, Prinz RJ. Potential roles of parental self-efficacy in parent and child  
189 adjustment: A review. *Clin Psychol Rev*. 2005;25(3):341–63.
- 190 6. Shorey S, Chan SWC, Chong YS, He HG. Maternal parental self-efficacy in newborn  
191 care and social support needs in Singapore: A correlational study. *J Clin Nurs*.  
192 2014;23(15–16):2272–83.
- 193 7. Bryanton J, Gagnon AJ, Hatem M, Johnston C. Predictors of early parenting self-  
194 efficacy: Results of a prospective cohort study. *Nurs Res*. 2008;57(4):252–9.
- 195 8. Dol J, Richardson B, Grant A, Aston M, McMillan D, Tomblin Murphy G, et al.  
196 Influence of parity and infant age on maternal self-efficacy, social support, postpartum  
197 anxiety, and postpartum depression in the first six months in the Maritime Provinces,  
198 Canada. *Birth*. 2021;48(3):438–47.
- 199 9. Haslam D, Pakenham K, Smith A. Social support and postpartum depressive  
200 symptomatology: The mediating role of maternal self-efficacy. *Infant Ment Health J*.  
201 2006;27(3):276–91.
- 202 10. Esmaelzadeh Saeieh S, Rahimzadeh M, Yazdkhasti M, Torkashvand S. Perceived social  
203 support and maternal competence in primipara women during pregnancy and after  
204 childbirth. *Int J Community Based Nurs Midwifery*. 2017;5(4):408–16.
- 205 11. Kohlhoff J, Barnett B. Parenting self-efficacy: Links with maternal depression, infant  
206 behaviour and adult attachment. *Early Hum Dev*. 2013;89(4):249–56.
- 207 12. Reck C, Noe D, Gerstenlauer J, Stehle E. Effects of postpartum anxiety disorders and  
208 depression on maternal self-confidence. *Infant Behav Dev*. 2012;35(2):264–72.
- 209 13. Brage Hudson D, Elek SM, Ofe Fleck M. FIRST-TIME MOTHERS' AND FATHERS'  
210 TRANSITION TO PARENTHOOD: Infant Care Self-Efficacy, Parenting Satisfaction,  
211 and Infant Sex. *Issues Compr Pediatr Nurs*. 2001;24(1):31–43.
- 212 14. Yang X, Ke S, Gao LL. Social support, parental role competence and satisfaction among  
213 Chinese mothers and fathers in the early postpartum period: A cross-sectional study.  
214 *Women Birth J Aust Coll Midwives*. 2020 May;33(3):e280–5.

- 215 15. Murdock K. An Examination of Parental Self-Efficacy Among Mothers and Fathers.  
216 Psychol Men Masculinity. 2013 Feb 7;14:314–23.
- 217 16. Shorey S, Ang L, Goh E, Gandhi M. Factors influencing paternal involvement during  
218 infancy: A prospective longitudinal study. J Adv Nurs. 2018;75.
- 219 17. Donithen R, Schoppe-Sullivan S. Correlates and predictors of parenting self-efficacy in  
220 new fathers. J Fam Psychol. 2022 Apr;36(3):396–405.
- 221 18. Fang Y, Boelens M, Windhorst DA, Raat H, van Grieken A. Factors associated with  
222 parenting self-efficacy: A systematic review. J Adv Nurs. 2021;77(6):2641–61.
- 223 19. Gordo L, Oliver-Roig A, Martínez-Pampliega A, Elejalde LI, Fernández-Alcantara M,  
224 Richart-Martínez M. Parental perception of child vulnerability and parental competence:  
225 The role of postnatal depression and parental stress in fathers and mothers. PLOS ONE.  
226 2018 Aug 27;13(8):e0202894.
- 227 20. Hafford-Letchfield T, Cocker C, Rutter D, Tinarwo M, McCormack K, Manning R. What  
228 do we know about transgender parenting?: Findings from a systematic review. Health  
229 Soc Care Community. 2019;27(5):1111–25.
- 230 21. Biocco R, Carone N, Ioverno S, Lingiardi V. Same-Sex and Different-Sex Parent  
231 Families in Italy: Is Parents’ Sexual Orientation Associated with Child Health Outcomes  
232 and Parental Dimensions? J Dev Behav Pediatr JDBP. 2018;39(1):555–63.
- 233 22. Government of Canada SC. Census in Brief: Same-sex couples in Canada in 2016  
234 [Internet]. 2017 [cited 2023 Aug 15]. Available from:  
235 [https://www12.statcan.gc.ca/census-recensement/2016/as-sa/98-200-x/2016007/98-200-](https://www12.statcan.gc.ca/census-recensement/2016/as-sa/98-200-x/2016007/98-200-x2016007-eng.cfm)  
236 [x2016007-eng.cfm](https://www12.statcan.gc.ca/census-recensement/2016/as-sa/98-200-x/2016007/98-200-x2016007-eng.cfm)
- 237 23. Government of Canada SC. Family and household characteristics of lesbian, gay and  
238 bisexual people in Canada [Internet]. 2021 [cited 2023 Aug 15]. Available from:  
239 <https://www150.statcan.gc.ca/n1/pub/89-28-0001/2018001/article/00021-eng.htm>
- 240 24. Gates G. LGBT Parenting in the United States [Internet]. Williams Institute. [cited 2023  
241 Aug 15]. Available from: [https://williamsinstitute.law.ucla.edu/publications/lgbt-](https://williamsinstitute.law.ucla.edu/publications/lgbt-parenting-us/)  
242 [parenting-us/](https://williamsinstitute.law.ucla.edu/publications/lgbt-parenting-us/)
- 243 25. Rubio B, Vecho O, Gross M, van Rijn-van Gelderen L, Bos H, Ellis-Davies K, et al.  
244 Transition to parenthood and quality of parenting among gay, lesbian and heterosexual  
245 couples who conceived through assisted reproduction. J Fam Stud. 2020 Aug;26(3):422–  
246 40.
- 247 26. Leahy-Warren P, Philpott L, Elmir R, Schmied V. Fathers’ perceptions and experiences  
248 of support to be a parenting partner during the perinatal period: A scoping review. J Clin  
249 Nurs. 2023;32(13–14):3378–96.
- 250 27. Sæther KM, Berg RC, Fagerlund BH, Glavin K, Jøranson N. First-time parents’  
251 experiences related to parental self-efficacy: A scoping review. Res Nurs Health.  
252 2023;46(1):101–12.



- 253 28. Tricco AC, Lillie E, Zarin W, O'Brien KK, Colquhoun H, Levac D, et al. PRISMA  
254 extension for scoping reviews (PRISMA-ScR): Checklist and explanation. *Ann Intern*  
255 *Med.* 2018;169(7):467–73.
- 256 29. Joanna Briggs Institute. *The Joanna Briggs Institute reviewers' manual 2015*  
257 *methodology for JBI scoping reviews.* South Australia; 2015.
- 258 30. McGowan J, Sampson M, Salzwedel DM, Cogo E, Foerster V, Lefebvre C. *PRESS Peer*  
259 *Review of Electronic Search Strategies: 2015 Guideline Statement.* *J Clin Epidemiol.*  
260 2016 Jul;75:40–6.
- 261 31. Veritas Health Innovation. *Covidence Systematic Review Software [Internet].*  
262 *Melbourne, Australia; Available from: [www.covidence.org](http://www.covidence.org)*
- 263
- 264
- 265
- 266

267 Appendix I: Search strategy for APA PsycInfo

268

| #   | Query                                                                                                                                                                                                                                                                                                                                           | Limiters/Expanders                                                                             |
|-----|-------------------------------------------------------------------------------------------------------------------------------------------------------------------------------------------------------------------------------------------------------------------------------------------------------------------------------------------------|------------------------------------------------------------------------------------------------|
| S1  | TI ( "self-efficacy" or confiden* or competen* or agency ) OR AB ( "self-efficacy" or confiden* or competen* or agency )                                                                                                                                                                                                                        | Expanders - Apply related words;<br>Apply equivalent subjects<br>Search modes - Boolean/Phrase |
| S2  | DE "Self-Efficacy"                                                                                                                                                                                                                                                                                                                              | Expanders - Apply related words;<br>Apply equivalent subjects<br>Search modes - Boolean/Phrase |
| S3  | DE "Self-Confidence"                                                                                                                                                                                                                                                                                                                            | Expanders - Apply related words;<br>Apply equivalent subjects<br>Search modes - Boolean/Phrase |
| S4  | DE "Competence"                                                                                                                                                                                                                                                                                                                                 | Expanders - Apply related words;<br>Apply equivalent subjects<br>Search modes - Boolean/Phrase |
| S5  | DE "Agency"                                                                                                                                                                                                                                                                                                                                     | Expanders - Apply related words;<br>Apply equivalent subjects<br>Search modes - Boolean/Phrase |
| S6  | S1 OR S2 OR S3 OR S4 OR S5                                                                                                                                                                                                                                                                                                                      | Expanders - Apply related words;<br>Apply equivalent subjects<br>Search modes - Boolean/Phrase |
| S7  | TI ( postpartum or "post-partum" or postnatal or "post-natal" or perinatal or "peri-natal" or "post-birth" or neonat* or infant* or newborn# or baby or babies ) OR AB ( postpartum or "post-partum" or postnatal or "post-natal" or perinatal or "peri-natal" or "post-birth" or neonat* or infant* or newborn# or baby or babies )            | Expanders - Apply related words;<br>Apply equivalent subjects<br>Search modes - Boolean/Phrase |
| S8  | DE "Postnatal Period"                                                                                                                                                                                                                                                                                                                           | Expanders - Apply related words;<br>Apply equivalent subjects<br>Search modes - Boolean/Phrase |
| S9  | DE "Neonatal Period"                                                                                                                                                                                                                                                                                                                            | Expanders - Apply related words;<br>Apply equivalent subjects<br>Search modes - Boolean/Phrase |
| S10 | S7 OR S8 OR S9                                                                                                                                                                                                                                                                                                                                  | Expanders - Apply related words;<br>Apply equivalent subjects<br>Search modes - Boolean/Phrase |
| S11 | TI ( father* or paternal or dad or dads or stepparent* or "step-parent*" or stepfather* or "step-father*" or stepdad# or "step-dad#" or coparent* or "co-parent*" or nonbirthing or "non-birthing" ) OR AB ( father* or paternal or dad or dads or stepparent* or "step-parent*" or stepfather* or "step-father*" or stepdad# or "step-dad#" or | Expanders - Apply related words;<br>Apply equivalent subjects<br>Search modes - Boolean/Phrase |

|     |                                                                                                                                                                                                                                                                                                                                                                                                                                                                                                                                                                                                                                                                                                                                                                                                                                                                                                                                                                                            |                                                                                                                                             |
|-----|--------------------------------------------------------------------------------------------------------------------------------------------------------------------------------------------------------------------------------------------------------------------------------------------------------------------------------------------------------------------------------------------------------------------------------------------------------------------------------------------------------------------------------------------------------------------------------------------------------------------------------------------------------------------------------------------------------------------------------------------------------------------------------------------------------------------------------------------------------------------------------------------------------------------------------------------------------------------------------------------|---------------------------------------------------------------------------------------------------------------------------------------------|
|     | coparent* or "co-parent*" or nonbirthing or "non-birthing" )                                                                                                                                                                                                                                                                                                                                                                                                                                                                                                                                                                                                                                                                                                                                                                                                                                                                                                                               |                                                                                                                                             |
| S12 | TI ( (agender or androgynous or bicurious or bigender or bisexual* or "cross sex" or crossgender or gay or "gender fluid" or "gender non-conform*" or genderfluid or genderfuck* or genderless or genderqueer or GLB* or heteroflexible or homosexual* or intersex or lesbian* or lesbigay or LGB* or nonbinary or "non-binary" or nongendered or "non-gendered" or queer or "same gender" or "same sex" or "third gender" or trans* or "two-spirit") N1 (parent* or mother* or maternal) ) OR AB ( (agender or androgynous or bicurious or bigender or bisexual* or "cross sex" or crossgender or gay or "gender fluid" or "gender non-conform*" or genderfluid or genderfuck* or genderless or genderqueer or GLB* or heteroflexible or homosexual* or intersex or lesbian* or lesbigay or LGB* or nonbinary or "non-binary" or nongendered or "non-gendered" or queer or "same gender" or "same sex" or "third gender" or trans* or "two-spirit") N1 (parent* or mother* or maternal) ) | Expanders - Apply related words;<br>Apply equivalent subjects<br>Search modes - Boolean/Phrase                                              |
| S13 | TI ( (adopt* or foster*) N1 (parent* or mother* or maternal) ) OR AB ( (adopt* or foster*) N1 (parent* or mother* or maternal) )                                                                                                                                                                                                                                                                                                                                                                                                                                                                                                                                                                                                                                                                                                                                                                                                                                                           | Expanders - Apply related words;<br>Apply equivalent subjects<br>Search modes - Boolean/Phrase                                              |
| S14 | DE "Adoptive Parents" OR DE "Fathers" OR DE "Foster Parents" OR DE "Homosexual Parents" OR DE "Stepparents"                                                                                                                                                                                                                                                                                                                                                                                                                                                                                                                                                                                                                                                                                                                                                                                                                                                                                | Expanders - Apply related words;<br>Apply equivalent subjects<br>Search modes - Boolean/Phrase                                              |
| S15 | S11 OR S12 OR S13 OR S14                                                                                                                                                                                                                                                                                                                                                                                                                                                                                                                                                                                                                                                                                                                                                                                                                                                                                                                                                                   | Expanders - Apply related words;<br>Apply equivalent subjects<br>Search modes - Boolean/Phrase                                              |
| S16 | S6 AND S10 AND S15                                                                                                                                                                                                                                                                                                                                                                                                                                                                                                                                                                                                                                                                                                                                                                                                                                                                                                                                                                         | Limiters - Publication Type: All Journals<br>Expanders - Apply related words;<br>Apply equivalent subjects<br>Search modes - Boolean/Phrase |
